# Supplementary material for: K3LaTe2O9:Er: a novel green up-conversion luminescence material
Source: Royal Society of Chemistry journal article supplement (doi:10.1039/c7ra06191a), 2017-01-01
Supplement: c7ra06191a1.pdf [file c7ra06191a1.pdf]

$K_3LaTe_2O_9:Er$ : A Novel Green Up-conversion Luminescence Material

Hong Wang, Xiumei Yin, Mingming Xing, Yao Fu, Ying Tian\*, Xin Feng, Tao Jiang, Xixian Luo\*

(Physics Department, Dalian Maritime University, Dalian, Liaoning 116026, P R China)

## Supporting Information

---

\* Corresponding authors. Tel./ fax: +86 411 84723626. E-mail addresses: tianying15@hotmail.com.

\* Corresponding authors. Tel./ fax: +86 411 84723626. E-mail addresses: luoxixiandl@126.com.

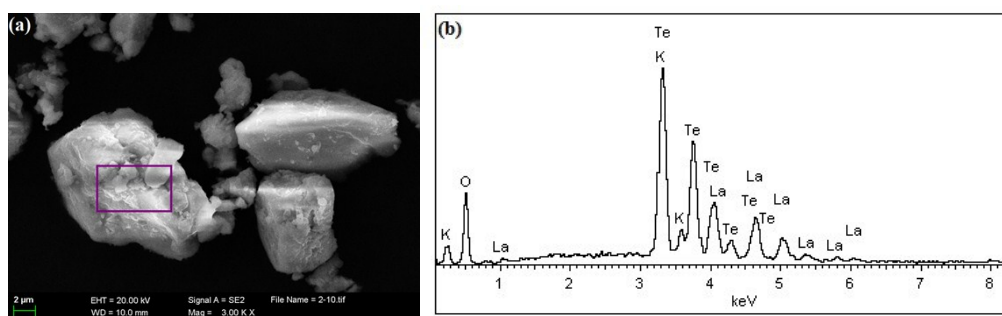

Fig. S1 SEM (a), and EDS (b) spectra of the  $K_3LaTe_2O_9$  sample.

Table S1 The concentration of element in the  $K_3LaTe_2O_9$  crystal

| <i>Element</i> | <i>Wt%</i> | <i>At%</i> |
|----------------|------------|------------|
| O K            | 19.04      | 55.71      |
| K K            | 18.35      | 21.97      |
| Te L           | 41.00      | 15.04      |
| La L           | 21.61      | 7.28       |
| Total Mass     | 100.00     |            |

The micrograph shows block particles with 5 – 10  $\mu\text{m}$  diameter (Fig. S1a). Like most micron particles prepared by solid phase method, the surface of the  $K_3LaTe_2O_9$ : Er crystals is not smooth and attached some small particles. The EDS of the sample was analyzed to determine the elements in the obtained sample (Fig. S1b). The main diffraction peaks in the spectrum correspond to O, K, Te and La elements. The molar ratio of K, La, Te, and O element is 3.0:1:2.1:7.7 (Tab. S1).

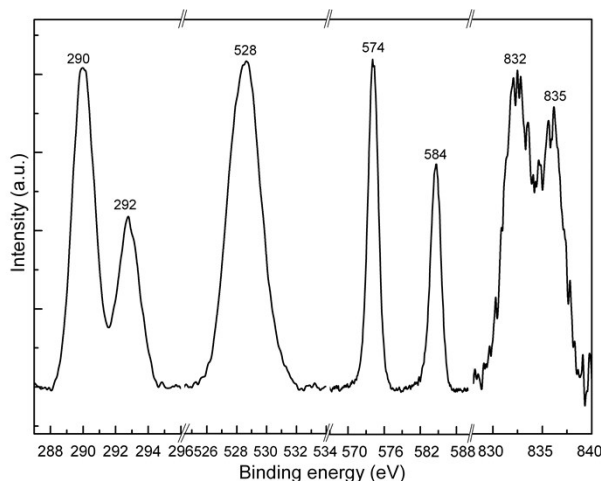

Fig. S2 XPS spectrum of the  $K_3LaTe_2O_9$ : 38%Er sample.

The element composition and oxidation states of the samples were determined by XPS analysis. As shown in Fig. S2, the binding energies of the diffraction peaks in the XPS pattern can be well indexed in accord with, K (290, 292 eV), O (528 eV), Te (574 eV), and La (832, 835 eV) elements corresponding to +1, -2, +6, +3 oxidation states, respectively. Subsequently, the atomic concentration of all elements in  $K_3LaTe_2O_9$ : 38% Er sample was obtained by elemental sensitivity factor method. The relative concentration values of K, O, Te, La, and Er atoms are 61.88, 18.47, 12.31, and 7.34 %, respectively, which are close to the theoretical calculated values.

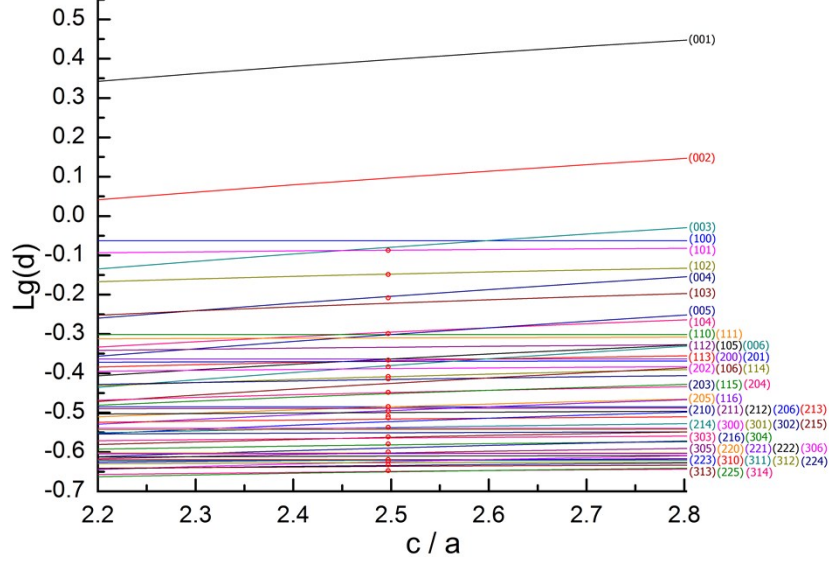

Fig. S3 Bunn crystal index calibration patterns of the hexagonal  $K_3LaTe_2O_9:0.02Er$ .

For a hexagonal crystal,

$$d = \frac{1}{\sqrt{4\left(\frac{h^2 + hk + k^2}{3a^2}\right) + \frac{l^2}{c^2}}}, \quad (1)$$

where  $d$  is the interplanar spacing;  $h$ ,  $k$ , and  $l$  are the indices of the lattice planes; and  $a$  and  $c$  are the lattice constants.

Eq. S1 can be rewritten as

$$\lg d = -\frac{1}{2} \lg \left[ \frac{4}{3}(h^2 + hk + k^2 - l^2) + l^2 \left( \frac{4}{3} + \frac{1}{(c^2/a^2)} \right) \right]. \quad (2)$$

The Bunn crystal index calibration patterns of the hexagonal crystal with  $h$ ,  $k$  and  $l \leq 6$  are shown in Fig. S3 according to Eq. S2 with the  $c/a$  ratio as the horizontal axis and  $\lg d$  as the vertical axis<sup>1</sup>. According to Bragg equation,

$$2d \sin \theta = k \lambda, \quad (3)$$

where  $\theta$  is the diffraction angle,  $k$  is the diffraction orders, and  $\lambda$  is the X-ray wavelength. The whole interplanar spacing  $d$  and  $\lg d$  of  $K_3LaTe_2O_9:0.02Er$  can be calculated based on Eq. S3 and the XRD data in Fig. 1a. The  $\lg d$  of all diffraction peaks is shown in Fig.S3 as circles according to the Bunn crystal index method. Tab. S2 shows the XRD index data of the  $K_3LaTe_2O_9$  sample.

Table S2 XRD index data of the  $K_3LaTe_2O_9:0.02Er$  sample

| Serial number | 2-Theta | d (Å)  | h | k | l | I(f) | I(v) |
|---------------|---------|--------|---|---|---|------|------|
| 1             | 17.98   | 4.9335 | 1 | 0 | 1 | 45   | 34   |
| 2             | 20.76   | 4.2787 | 1 | 0 | 2 | 32   | 25   |
| 3             | 23.84   | 3.7324 | 0 | 0 | 4 | 13   | 11   |
| 4             | 29.50   | 3.0279 | 1 | 1 | 0 | 100  | 100  |
| 5             | 34.56   | 2.5953 | 1 | 0 | 5 | 16   | 18   |
| 6             | 36.02   | 2.4934 | 0 | 0 | 6 | 12   | 12   |
| 7             | 38.20   | 2.3560 | 1 | 1 | 4 | 3    | 3    |
| 8             | 38.78   | 2.3221 | 2 | 0 | 3 | 6    | 5    |
| 9             | 42.08   | 2.1473 | 2 | 0 | 4 | 49   | 32   |
| 10            | 45.96   | 1.9746 | 2 | 0 | 5 | 12   | 19   |
| 11            | 47.20   | 1.9256 | 1 | 1 | 6 | 26   | 29   |
| 12            | 48.68   | 1.8705 | 2 | 1 | 3 | 14   | 14   |
| 13            | 52.26   | 1.7505 | 3 | 0 | 0 | 33   | 36   |
| 14            | 55.56   | 1.6541 | 2 | 1 | 5 | 14   | 16   |
| 15            | 58.08   | 1.5882 | 3 | 0 | 4 | 7    | 10   |
| 16            | 61.12   | 1.5162 | 2 | 2 | 0 | 20   | 20   |
| 17            | 64.20   | 1.4507 | 2 | 2 | 3 | 7    | 8    |
| 18            | 64.28   | 1.4491 | 3 | 1 | 1 | 7    | 8    |
| 19            | 65.08   | 1.4332 | 3 | 0 | 6 | 11   | 14   |
| 20            | 66.58   | 1.4045 | 2 | 2 | 4 | 4    | 5    |
| 21            | 69.18   | 1.3580 | 3 | 1 | 4 | 10   | 11   |

Table S3 The sensitivity of different materials based on fluorescence intensity ratio of  $Er^{3+}$  ions.

| Matrix                                        | Sensitivity ( $10^{-4}/K$ ) | Ref. |
|-----------------------------------------------|-----------------------------|------|
| NaGdTiO <sub>4</sub>                          | 40                          | [2]  |
| BaTiO <sub>3</sub>                            | 45                          | [3]  |
| $\beta$ -NaYF <sub>4</sub>                    | 48                          | [4]  |
| Y <sub>2</sub> Ti <sub>2</sub> O <sub>7</sub> | 67                          | [5]  |
| YNbO <sub>4</sub>                             | 73                          | [6]  |
| BaMoO <sub>4</sub>                            | 109                         | [7]  |
| NaY(MoO <sub>4</sub> ) <sub>2</sub>           | 114                         | [8]  |
| YVO <sub>4</sub>                              | 117                         | [9]  |
| Y <sub>2</sub> O <sub>3</sub>                 | 130                         | [10] |

The temperature sensitivity of different materials must be compared at the same experimental conditions (such as temperature, doping concentration and types etc.). The scientific reports on temperature sensitivity are focused on Yb,Er codoped upconversion materials. It is not comparable between previously reports and present work. Whereas, the temperature sensitivities data were provided in Tab.S3 to qualitatively assess the temperature sensitivity of different materials.

## References

- 
- [1] C. W. Bunn, *Chemical Crystallography*, Oxford: Oxford Univ. Press, 1945.
- [2] X. P. Li, X. Wang, H. Zhong, L. H. Cheng, S. Xu, J. S. Sun, J. S. Zhang, X. J. Li, L. L. Tong, B. J. Chen, Effects of  $\text{Er}^{3+}$  concentration on down-/up-conversion luminescence and temperature sensing properties in  $\text{NaGdTiO}_4:\text{Er}^{3+}/\text{Yb}^{3+}$  phosphors, *Ceram. Int.* 2016, 42, 14710.
- [3] M. A. R. C. Alencar, G. S. Maciel, C. B. de Araujo, A. Patra,  $\text{Er}^{3+}$ -Doped  $\text{BaTiO}_3$  Nanocrystals for Thermometry: Influence of Nanoenvironment on the Sensitivity of a Fluorescence Based Temperature Sensor. *Appl. Phys. Lett.* 2004, 84, 4753.
- [4] L. L. Tong, X. P. Li, R. N. Hua, X. J. Li, H. Zheng, J. S. Sun, J. S. Zhang, L. H. Cheng, B. J. Chen, Comparative study on upconversion luminescence and temperature sensing of  $\alpha$ - and  $\beta$ - $\text{NaYF}_4:\text{Yb}^{3+}/\text{Er}^{3+}$  nano-/micro-crystals derived from a microwave-assisted hydrothermal route, *J. Lumin.* 2015, 167, 386.
- [5] B. P. Singh, A. K. Parchur, R. S. Ningthoujam, P. V. Ramakrishna, S. Singh, P. Singh, S. B. Rai, R. Maalej, Enhanced up-Conversion and Temperature-Sensing Behaviour of  $\text{Er}^{3+}$  and  $\text{Yb}^{3+}$  Co-Doped  $\text{Y}_2\text{Ti}_2\text{O}_7$  by Incorporation of  $\text{Li}^+$  Ions. *Phys. Chem. Chem. Phys.* 2014, 16, 22665.
- [6] A. K. Singh, S. K. Singh, B. K. Gupta, R. Prakash, S. B. Rai, Probing a Highly Efficient Dual Mode: Down-Upconversion Luminescence and Temperature Sensing Performance of Rare-Earth Oxide Phosphors. *Dalton. T* 2013, 42, 1065.
- [7] A. K. Soni, A. Kumari, V. K. Rai, Optical Investigation in Shuttle Like  $\text{BaMoO}_4:\text{Er}^{3+} - \text{Yb}^{3+}$  Phosphor in Display and Temperature Sensing. *Sensor Actuat B-Chem* 2015, 216, 64.
- [8] Yang, X. X.; Fu, Z. L.; Yang, Y. M.; Zhang, C. P.; Wu, Z. J.; Sheng, T. Q. Optical Temperature Sensing Behavior of High-Efficiency Upconversion:  $\text{Er}^{3+}$ - $\text{Yb}^{3+}$  Co-Doped  $\text{NaY}(\text{MoO}_4)_2$  Phosphor. *J. Am. Ceram. Soc.* 2015, 98, 2595.
- [9] M. K. Mahata, K. Kumar, V. K. Rai,  $\text{Er}^{3+}$ - $\text{Yb}^{3+}$  Doped Vanadate Nanocrystals: A Highly Sensitive Thermographic Phosphor and Its Optical Nanoheater Behavior. *Sensor Actuat. B-Chem.* 2015, 209, 775.
- [10] V. Lojpur, G. Nikolic, M. D. Dramicanin, Luminescence Thermometry Below Room Temperature Via up-Conversion Emission of  $\text{Y}_2\text{O}_3:\text{Yb}^{3+}, \text{Er}^{3+}$  Nanophosphors. *J. Appl. Phys.* 2014, 20, 115.
